# Supplementary material for: Genomic and physiological properties of Anoxybacterium hadale gen. nov. sp. nov. reveal the important role of dissolved organic sulfur in microbial metabolism in hadal ecosystems
Source: Front Microbiol. 2024 Aug 16;15:1423245. doi: 10.3389/fmicb.2024.1423245 (PMC11362086; doi:10.3389/fmicb.2024.1423245)
Supplement: Supplementary file 2 [file Table_2.XLSX]

## Sheet: T.mod
Supplementary Table 2. The transporter genes in strain MT110T.
Locus tag	NCBI annotation	KEGG number	KEGG annotation
Carbohydrate transport
FRZ06_00040	PTS glucose transporter subunit IIA	K02777	sugar PTS system EIIA component [EC:2.7.1.-]
FRZ06_00045	PTS glucose transporter subunit IIBC	K02804	N-acetylglucosamine PTS system EIICBA or EIICB component [EC:2.7.1.193]
FRZ06_00185	MFS transporter	K03292	glycoside/pentoside/hexuronide:cation symporter, GPH family
FRZ06_00920	MFS transporter	K08174	MFS transporter, FHS family, glucose/mannose:H+ symporter
FRZ06_01615	sugar ABC transporter ATP-binding protein	K10558	AI-2 transport system ATP-binding protein
FRZ06_01620	ABC transporter permease	K10556	AI-2 transport system permease protein
FRZ06_01625	ABC transporter permease	K10557	AI-2 transport system permease protein
FRZ06_01630	substrate-binding domain-containing protein	K10555	AI-2 transport system substrate-binding protein
FRZ06_01715	substrate-binding domain-containing protein	K10439	ribose transport system substrate-binding protein
FRZ06_01720	sugar ABC transporter ATP-binding protein	K10441	ribose transport system ATP-binding protein [EC:7.5.2.7]
FRZ06_01725	ABC transporter permease	K10440	ribose transport system permease protein
FRZ06_01730	ABC transporter permease	K10440	ribose transport system permease protein
FRZ06_01980	PTS sugar transporter subunit IIA	K02773	galactitol PTS system EIIA component [EC:2.7.1.200]
FRZ06_01985	PTS fructose transporter subunit IIB	K02774	galactitol PTS system EIIB component [EC:2.7.1.200]
FRZ06_01990	PTS galactitol transporter subunit IIC	K02775	galactitol PTS system EIIC component
FRZ06_02290	PTS sugar transporter subunit IIA	K02773	galactitol PTS system EIIA component [EC:2.7.1.200]
FRZ06_02300	PTS sugar transporter subunit IIC	K02775	galactitol PTS system EIIC component
FRZ06_03565	sugar ABC transporter substrate-binding protein	K10439	ribose transport system substrate-binding protein
FRZ06_03570	sugar ABC transporter ATP-binding protein	K10441	ribose transport system ATP-binding protein [EC:7.5.2.7]
FRZ06_03575	ABC transporter permease	K10440	ribose transport system permease protein
FRZ06_05170	ribose ABC transporter substrate-binding protein RbsB	K10439	ribose transport system substrate-binding protein
FRZ06_05175	ribose ABC transporter permease	K10440	ribose transport system permease protein
FRZ06_05180	ATP-binding cassette domain-containing protein	K10441	ribose transport system ATP-binding protein [EC:7.5.2.7]
FRZ06_05420	ABC transporter ATP-binding protein	K10112	multiple sugar transport system ATP-binding protein [EC:7.5.2.-]
FRZ06_05425	ABC transporter ATP-binding protein	K10112	multiple sugar transport system ATP-binding protein [EC:7.5.2.-]
FRZ06_05430	carbohydrate ABC transporter permease	K02026	multiple sugar transport system permease protein
FRZ06_05435	sugar ABC transporter permease	K02025	multiple sugar transport system permease protein
FRZ06_05440	sugar ABC transporter substrate-binding protein	K02027	multiple sugar transport system substrate-binding protein
FRZ06_05505	6-phospho-beta-glucosidase	K01222	6-phospho-beta-glucosidase [EC:3.2.1.86]
FRZ06_05510	carbohydrate ABC transporter permease	K25069	fucose transport system permease protein
FRZ06_05515	sugar ABC transporter permease	K25068	fucose transport system permease protein
FRZ06_05520	extracellular solute-binding protein	K25067	fucose transport system substrate-binding protein
FRZ06_05655	PTS mannitol transporter subunit IIA	K02798	mannitol PTS system EIIA component [EC:2.7.1.197]
FRZ06_05660	PRD domain-containing protein	K03483	mannitol operon transcriptional activator
FRZ06_05665	PTS mannitol transporter subunit IICB	K02800	mannitol PTS system EIICBA or EIICB component [EC:2.7.1.197]
FRZ06_05715	ABC transporter permease	K10440	ribose transport system permease protein
FRZ06_05720	sugar ABC transporter ATP-binding protein	K10441	ribose transport system ATP-binding protein [EC:7.5.2.7]
FRZ06_05725	substrate-binding domain-containing protein	K10439	ribose transport system substrate-binding protein
FRZ06_05785	sugar ABC transporter substrate-binding protein	K10546	putative multiple sugar transport system substrate-binding protein
FRZ06_05790	sugar ABC transporter permease	K10547	putative multiple sugar transport system permease protein
FRZ06_05795	sugar ABC transporter ATP-binding protein	K10548	putative multiple sugar transport system ATP-binding protein [EC:7.5.2.-]
FRZ06_08105	EAL domain-containing protein	K02761	cellobiose PTS system EIIC component
FRZ06_08340	carbohydrate ABC transporter permease	K02026	multiple sugar transport system permease protein
FRZ06_08345	sugar ABC transporter permease	K02025	multiple sugar transport system permease protein
FRZ06_08350	carbohydrate ABC transporter substrate-binding protein	K02027	multiple sugar transport system substrate-binding protein
FRZ06_09190	ABC transporter permease	K10440	ribose transport system permease protein
FRZ06_09195	sugar ABC transporter ATP-binding protein	K10441	ribose transport system ATP-binding protein [EC:7.5.2.7]
FRZ06_09200	ABC transporter permease	K10440	ribose transport system permease protein
FRZ06_09205	sugar ABC transporter substrate-binding protein	K10439	ribose transport system substrate-binding protein
FRZ06_12705	carbohydrate ABC transporter permease	K10242	cellobiose transport system permease protein
FRZ06_12710	sugar ABC transporter permease	K10241	cellobiose transport system permease protein
FRZ06_12715	carbohydrate ABC transporter substrate-binding protein	K10240	cellobiose transport system substrate-binding protein
FRZ06_12905	ABC transporter permease	K10440	ribose transport system permease protein
FRZ06_12910	sugar ABC transporter ATP-binding protein	K10441	ribose transport system ATP-binding protein [EC:7.5.2.7]
FRZ06_12915	ABC transporter permease	K10440	ribose transport system permease protein
FRZ06_12920	sugar ABC transporter substrate-binding protein	K10439	ribose transport system substrate-binding protein
FRZ06_12975	ABC transporter permease	K10440	ribose transport system permease protein
FRZ06_12980	sugar ABC transporter ATP-binding protein	K10441	ribose transport system ATP-binding protein [EC:7.5.2.7]
FRZ06_12985	ABC transporter permease	K10440	ribose transport system permease protein
FRZ06_12990	substrate-binding domain-containing protein	K10439	ribose transport system substrate-binding protein
FRZ06_13005	PTS sugar transporter subunit IIA	K02744	N-acetylgalactosamine PTS system EIIA component [EC:2.7.1.-]
FRZ06_13010	PTS system mannose/fructose/sorbose family transporter subunit IID	K17467	D-glucosaminate PTS system EIID component
FRZ06_13015	PTS sugar transporter subunit IIC	K02795	mannose PTS system EIIC component
FRZ06_13020	PTS sugar transporter subunit IIB	K17465	D-glucosaminate PTS system EIIB component [EC:2.7.1.203]
FRZ06_14715	substrate-binding domain-containing protein	K23508	galactofuranose transport system substrate-binding protein
FRZ06_14790	sn-glycerol-3-phosphate ABC transporter ATP-binding protein UgpC	K10112	multiple sugar transport system ATP-binding protein [EC:7.5.2.-]
FRZ06_15645	hypothetical protein	K03307	solute:Na+ symporter, SSS family
FRZ06_15890	sugar ABC transporter permease	K10547	putative multiple sugar transport system permease protein
FRZ06_15895	sugar ABC transporter ATP-binding protein	K10548	putative multiple sugar transport system ATP-binding protein [EC:7.5.2.-]
FRZ06_15900	sugar ABC transporter substrate-binding protein	K10546	putative multiple sugar transport system substrate-binding protein
FRZ06_15965	ABC transporter permease	K10440	ribose transport system permease protein
FRZ06_15970	sugar ABC transporter ATP-binding protein	K10441	ribose transport system ATP-binding protein [EC:7.5.2.7]
FRZ06_15975	substrate-binding domain-containing protein	K10439	ribose transport system substrate-binding protein
FRZ06_16040	sugar ABC transporter substrate-binding protein	K10543	D-xylose transport system substrate-binding protein
FRZ06_16055	sugar ABC transporter substrate-binding protein	K10439	ribose transport system substrate-binding protein
FRZ06_17460	PTS mannitol transporter subunit IICB	K02800	mannitol PTS system EIICBA or EIICB component [EC:2.7.1.197]
FRZ06_17470	PTS sugar transporter subunit IIA	K02798	mannitol PTS system EIIA component [EC:2.7.1.197]
FRZ06_18125	PTS glucose transporter subunit IIB	K02779	glucose PTS system EIICB or EIICBA component [EC:2.7.1.199]
FRZ06_18160	extracellular solute-binding protein	K02027	multiple sugar transport system substrate-binding protein
FRZ06_18165	sugar ABC transporter permease	K02025	multiple sugar transport system permease protein
FRZ06_18170	carbohydrate ABC transporter permease	K02026	multiple sugar transport system permease protein
FRZ06_18755	sugar ABC transporter ATP-binding protein	K17215	inositol transport system ATP-binding protein
FRZ06_18760	ABC transporter permease	K17214	inositol transport system permease protein
FRZ06_18765	sugar ABC transporter substrate-binding protein	K17213	inositol transport system substrate-binding protein
FRZ06_18905	sugar ABC transporter substrate-binding protein	K10439	ribose transport system substrate-binding protein
FRZ06_18910	ABC transporter permease	K10440	ribose transport system permease protein
FRZ06_18915	sugar ABC transporter ATP-binding protein	K10441	ribose transport system ATP-binding protein [EC:7.5.2.7]
FRZ06_18920	ABC transporter permease	K10440	ribose transport system permease protein
FRZ06_19615	PTS sorbitol transporter subunit IIC	K02783	glucitol/sorbitol PTS system EIIC component
FRZ06_19620	PTS sorbitol transporter subunit IIB	K02782	glucitol/sorbitol PTS system EIIB component [EC:2.7.1.198]
FRZ06_19625	PTS sorbitol transporter subunit IIA	K02781	glucitol/sorbitol PTS system EIIA component [EC:2.7.1.198]
FRZ06_19750	ABC transporter substrate-binding protein	K23508	galactofuranose transport system substrate-binding protein
FRZ06_19755	sugar ABC transporter ATP-binding protein	K10820	galactofuranose transport system ATP-binding protein [EC:7.5.2.9]
FRZ06_19760	ABC transporter permease	K23509	galactofuranose transport system permease protein
FRZ06_19765	sugar ABC transporter permease YjfF	K23509	galactofuranose transport system permease protein
FRZ06_19875	sugar ABC transporter substrate-binding protein	K17213	inositol transport system substrate-binding protein
FRZ06_19880	sugar ABC transporter ATP-binding protein	K17215	inositol transport system ATP-binding protein
FRZ06_19885	ABC transporter permease	K17214	inositol transport system permease protein
FRZ06_20530	sugar ABC transporter ATP-binding protein	K17215	inositol transport system ATP-binding protein
FRZ06_20535	ABC transporter permease	K17214	inositol transport system permease protein
FRZ06_20540	sugar ABC transporter substrate-binding protein	K17213	inositol transport system substrate-binding protein
FRZ06_21580	PTS sugar transporter subunit IIA	K19506	fructoselysine/glucoselysine PTS system EIIA component [EC:2.7.1.-]
FRZ06_21585	PTS sugar transporter subunit IIB	K19507	fructoselysine/glucoselysine PTS system EIIB component [EC:2.7.1.-]
FRZ06_21590	PTS sugar transporter subunit IIC	K19508	fructoselysine/glucoselysine PTS system EIIC component
FRZ06_21595	PTS system mannose/fructose/sorbose family transporter subunit IID	K02796	mannose PTS system EIID component
FRZ06_04215	hypothetical protein	K03292	glycoside/pentoside/hexuronide:cation symporter, GPH family
FRZ06_12695	MFS transporter	K03292	glycoside/pentoside/hexuronide:cation symporter, GPH family
Carboxylic acid and ascorbate transport
FRZ06_01770	AEC family transporter	K24180	malate permease and related proteins
FRZ06_05630	L-lactate permease	K03303	lactate permease
FRZ06_07350	AEC family transporter	K24180	malate permease and related proteins
FRZ06_08110	TRAP transporter large permease	K11690	C4-dicarboxylate transporter, DctM subunit
FRZ06_08115	TRAP transporter small permease	K11689	C4-dicarboxylate transporter, DctQ subunit
FRZ06_08120	hypothetical protein	K21395	TRAP-type transport system periplasmic protein
FRZ06_09795	L-lactate permease	K03303	lactate permease
FRZ06_12645	C4-dicarboxylate ABC transporter permease	K07793	putative tricarboxylic transport membrane protein
FRZ06_12650	tripartite tricarboxylate transporter TctB family protein	K07794	putative tricarboxylic transport membrane protein
FRZ06_12655	tripartite tricarboxylate transporter substrate binding protein	K07795	putative tricarboxylic transport membrane protein
FRZ06_13760	TRAP transporter large permease	K11690	C4-dicarboxylate transporter, DctM subunit
FRZ06_13765	TRAP transporter small permease	K21394	TRAP-type transport system small permease protein
FRZ06_13770	TRAP transporter substrate-binding protein	K21395	TRAP-type transport system periplasmic protein
FRZ06_16725	DctP family TRAP transporter solute-binding subunit	K21395	TRAP-type transport system periplasmic protein
FRZ06_16730	TRAP transporter small permease	K21394	TRAP-type transport system small permease protein
FRZ06_16735	TRAP transporter large permease	K11690	C4-dicarboxylate transporter, DctM subunit
FRZ06_09135	PTS ascorbate transporter subunit IIC	K03475	ascorbate PTS system EIIC component
FRZ06_09140	PTS sugar transporter subunit IIB	K02822	ascorbate PTS system EIIB component [EC:2.7.1.194]
FRZ06_09145	PTS sugar transporter subunit IIA	K02821	ascorbate PTS system EIIA or EIIAB component [EC:2.7.1.194]
Amino acid and peptide transport
FRZ06_01340	ABC transporter substrate-binding protein	K01989	putative tryptophan/tyrosine transport system substrate-binding protein
FRZ06_01345	ABC transporter permease	K05832	putative tryptophan/tyrosine transport system permease protein
FRZ06_01350	ATP-binding cassette domain-containing protein	K05833	putative tryptophan/tyrosine transport system ATP-binding protein
FRZ06_02075	amino acid permease	K03293	amino acid transporter, AAT family
FRZ06_03260	ABC transporter substrate-binding protein	K01999	branched-chain amino acid transport system substrate-binding protein
FRZ06_03265	branched-chain amino acid ABC transporter permease	K01997	branched-chain amino acid transport system permease protein
FRZ06_03270	branched-chain amino acid ABC transporter permease	K01998	branched-chain amino acid transport system permease protein
FRZ06_03275	ABC transporter ATP-binding protein	K01995	branched-chain amino acid transport system ATP-binding protein
FRZ06_03280	ABC transporter ATP-binding protein	K01996	branched-chain amino acid transport system ATP-binding protein
FRZ06_03890	amino acid ABC transporter substrate-binding protein	K02030	polar amino acid transport system substrate-binding protein
FRZ06_03895	amino acid ABC transporter permease	K02029	polar amino acid transport system permease protein
FRZ06_03900	amino acid ABC transporter ATP-binding protein	K02028	polar amino acid transport system ATP-binding protein [EC:7.4.2.1]
FRZ06_04360	ABC transporter substrate-binding protein	K01999	branched-chain amino acid transport system substrate-binding protein
FRZ06_04365	branched-chain amino acid ABC transporter permease	K01997	branched-chain amino acid transport system permease protein
FRZ06_04370	branched-chain amino acid ABC transporter permease	K01998	branched-chain amino acid transport system permease protein
FRZ06_04375	ABC transporter ATP-binding protein	K01995	branched-chain amino acid transport system ATP-binding protein
FRZ06_04380	ABC transporter ATP-binding protein	K01996	branched-chain amino acid transport system ATP-binding protein
FRZ06_04780	APC family permease	K03294	basic amino acid/polyamine antiporter, APA family
FRZ06_05565	amino acid permease	K03293	amino acid transporter, AAT family
FRZ06_06365	ATP-binding cassette domain-containing protein	K23060	arginine/lysine/histidine transport system ATP-binding protein [EC:7.4.2.1]
FRZ06_06370	ABC transporter permease subunit	K02029	polar amino acid transport system permease protein K02030 polar amino acid transport system substrate-binding protein
FRZ06_06375	amino acid ABC transporter substrate-binding protein	K02030	polar amino acid transport system substrate-binding protein
FRZ06_06390	ATP-binding cassette domain-containing protein	K02028	polar amino acid transport system ATP-binding protein [EC:7.4.2.1]
FRZ06_06395	ABC transporter permease subunit	K17077	arginine/lysine/histidine transport system permease protein
FRZ06_06400	transporter substrate-binding domain-containing protein	K02030	polar amino acid transport system substrate-binding protein
FRZ06_07380	amino acid ABC transporter ATP-binding protein	K10010	L-cystine transport system ATP-binding protein [EC:7.4.2.1]
FRZ06_07385	amino acid ABC transporter permease	K10009	L-cystine transport system permease protein
FRZ06_07390	amino acid ABC transporter substrate-binding protein	K02424	L-cystine transport system substrate-binding protein
FRZ06_07920	amino acid permease	K11733	lysine-specific permease
FRZ06_07925	APC family permease	K03294	basic amino acid/polyamine antiporter, APA family
FRZ06_07935	hypothetical protein	K02030	polar amino acid transport system substrate-binding protein
FRZ06_08210	amino acid ABC transporter ATP-binding protein	K17076	putative lysine transport system ATP-binding protein
FRZ06_08215	amino acid ABC transporter permease	K17074	putative lysine transport system permease protein
FRZ06_08220	transporter substrate-binding domain-containing protein	K17073	putative lysine transport system substrate-binding protein
FRZ06_08940	amino acid permease	K11733	lysine-specific permease
FRZ06_09110	EAL domain-containing protein	K02030	polar amino acid transport system substrate-binding protein
FRZ06_09120	amino acid permease	K11733	lysine-specific permease
FRZ06_09825	amino acid ABC transporter ATP-binding protein	K10038	glutamine transport system ATP-binding protein [EC:7.4.2.1]
FRZ06_09830	amino acid ABC transporter permease	K10037	glutamine transport system permease protein
FRZ06_09835	basic amino acid ABC transporter substrate-binding protein	K10036	glutamine transport system substrate-binding protein
FRZ06_10320	lysine transporter LysE	K11249	cysteine/O-acetylserine efflux protein
FRZ06_10720	amino acid permease	K03294	basic amino acid/polyamine antiporter, APA family
FRZ06_11125	amino acid permease	K11733	lysine-specific permease
FRZ06_11205	amino acid permease	K03293	amino acid transporter, AAT family
FRZ06_11995	sodium:alanine symporter family protein	K03310	alanine or glycine:cation symporter, AGCS family
FRZ06_12000	sodium:alanine symporter family protein	K03310	alanine or glycine:cation symporter, AGCS family
FRZ06_13740	transporter substrate-binding domain-containing protein	K02030	polar amino acid transport system substrate-binding protein
FRZ06_13745	amino acid permease	K03294	basic amino acid/polyamine antiporter, APA family
FRZ06_13750	APC family permease	K03294	basic amino acid/polyamine antiporter, APA family
FRZ06_13895	ABC transporter substrate-binding protein	K01999	branched-chain amino acid transport system substrate-binding protein
FRZ06_13900	ABC transporter substrate-binding protein	K01999	branched-chain amino acid transport system substrate-binding protein
FRZ06_13905	ABC transporter ATP-binding protein	K01996	branched-chain amino acid transport system ATP-binding protein
FRZ06_13910	ABC transporter ATP-binding protein	K01995	branched-chain amino acid transport system ATP-binding protein
FRZ06_13915	branched-chain amino acid ABC transporter permease	K01998	branched-chain amino acid transport system permease protein
FRZ06_13920	branched-chain amino acid ABC transporter permease	K01997	branched-chain amino acid transport system permease protein
FRZ06_13925	ABC transporter substrate-binding protein	K01999	branched-chain amino acid transport system substrate-binding protein
FRZ06_14305	APC family permease	K03294	basic amino acid/polyamine antiporter, APA family
FRZ06_14410	ABC transporter permease	K02033	peptide/nickel transport system permease protein
FRZ06_14415	ABC transporter permease	K02034	peptide/nickel transport system permease protein
FRZ06_14420	ABC transporter substrate-binding protein	K02035	peptide/nickel transport system substrate-binding protein
FRZ06_14425	ABC transporter ATP-binding protein	K02031	peptide/nickel transport system ATP-binding protein
FRZ06_14430	ABC transporter ATP-binding protein	K02032	peptide/nickel transport system ATP-binding protein
FRZ06_14445	glycine/betaine ABC transporter substrate-binding protein	K05845	osmoprotectant transport system substrate-binding protein
FRZ06_14450	ABC transporter permease	K05846	osmoprotectant transport system permease protein
FRZ06_14455	ABC transporter permease	K05846	osmoprotectant transport system permease protein
FRZ06_14460	betaine/proline/choline family ABC transporter ATP-binding protein	K05847	osmoprotectant transport system ATP-binding protein [EC:7.6.2.9]
FRZ06_15660	sodium:solute symporter family protein	K03307	solute:Na+ symporter, SSS family
FRZ06_16515	ABC transporter permease	K05846	osmoprotectant transport system permease protein
FRZ06_16520	glycine/betaine ABC transporter substrate-binding protein	K05845	osmoprotectant transport system substrate-binding protein
FRZ06_16530	ABC transporter ATP-binding protein	K05847	osmoprotectant transport system ATP-binding protein [EC:7.6.2.9]
FRZ06_16535	ABC transporter permease	K05846	osmoprotectant transport system permease protein
FRZ06_16590	BCCT family transporter	K05020	glycine betaine transporter
FRZ06_17595	transporter substrate-binding domain-containing protein	K10036	glutamine transport system substrate-binding protein
FRZ06_17600	amino acid ABC transporter permease	K10037	glutamine transport system permease protein
FRZ06_17605	amino acid ABC transporter ATP-binding protein	K10038	glutamine transport system ATP-binding protein [EC:7.4.2.1]
FRZ06_18410	cytosine permease	K10974	cytosine permease
FRZ06_18940	branched-chain amino acid ABC transporter substrate-binding protein	K01999	branched-chain amino acid transport system substrate-binding protein
FRZ06_18945	branched-chain amino acid ABC transporter permease	K01997	branched-chain amino acid transport system permease protein
FRZ06_18950	branched-chain amino acid ABC transporter permease	K01998	branched-chain amino acid transport system permease protein
FRZ06_18955	ABC transporter ATP-binding protein	K01995	branched-chain amino acid transport system ATP-binding protein
FRZ06_18960	ABC transporter ATP-binding protein	K01996	branched-chain amino acid transport system ATP-binding protein
FRZ06_18965	amino acid ABC transporter permease	K02029	polar amino acid transport system permease protein
FRZ06_18970	amino acid ABC transporter permease	K02029	polar amino acid transport system permease protein
FRZ06_18975	amino acid ABC transporter ATP-binding protein	K02028	polar amino acid transport system ATP-binding protein [EC:7.4.2.1]
FRZ06_18980	transporter substrate-binding domain-containing protein	K02030	polar amino acid transport system substrate-binding protein
FRZ06_19335	ATP-binding cassette domain-containing protein	K02071	D-methionine transport system ATP-binding protein
FRZ06_19340	ABC transporter permease	K02072	D-methionine transport system permease protein
FRZ06_19345	ABC transporter substrate-binding protein	K02073	D-methionine transport system substrate-binding protein
FRZ06_19835	amino acid permease	K11733	lysine-specific permease
FRZ06_20815	ABC transporter substrate-binding protein	K01989	putative tryptophan/tyrosine transport system substrate-binding protein
FRZ06_20820	ABC transporter permease	K05832	putative tryptophan/tyrosine transport system permease protein
FRZ06_20825	ATP-binding cassette domain-containing protein	K05833	putative tryptophan/tyrosine transport system ATP-binding protein
FRZ06_21015	ABC transporter ATP-binding protein	K02031	peptide/nickel transport system ATP-binding protein K02032 peptide/nickel transport system ATP-binding protein
FRZ06_21020	ABC transporter permease	K02034	peptide/nickel transport system permease protein
FRZ06_21025	ABC transporter permease	K02033	peptide/nickel transport system permease protein
FRZ06_21030	ABC transporter substrate-binding protein	K02035	peptide/nickel transport system substrate-binding protein
FRZ06_01585	sodium:solute symporter family protein	K11928	sodium/proline symporter
FRZ06_08870	sodium:glutamate symporter	K03312	glutamate:Na+ symporter, ESS family
FRZ06_10775	alanine:cation symporter family protein	K03310	alanine or glycine:cation symporter, AGCS family
FRZ06_11995	sodium:alanine symporter family protein	K03310	alanine or glycine:cation symporter, AGCS family
FRZ06_12000	sodium:alanine symporter family protein	K03310	alanine or glycine:cation symporter, AGCS family
FRZ06_15555	sodium/proline symporter PutP	K11928	sodium/proline symporter
Nucleobase and nucleoside transport
FRZ06_00575	NCS2 family permease	K06901	adenine/guanine/hypoxanthine permease
FRZ06_05745	adenine deaminase	K01486	adenine deaminase [EC:3.5.4.2]
FRZ06_05750	adenine deaminase	K01486	adenine deaminase [EC:3.5.4.2]
FRZ06_05755	BMP family ABC transporter substrate-binding protein	K07335	basic membrane protein A and related proteins
FRZ06_05760	ABC transporter permease	K23536	general nucleoside transport system permease protein
FRZ06_05765	ABC transporter permease	K23535	general nucleoside transport system permease protein
FRZ06_05770	ABC transporter ATP-binding protein	K23537	general nucleoside transport system ATP-binding protein
FRZ06_07660	putative hydroxymethylpyrimidine transporter CytX	K03457	nucleobase:cation symporter-1, NCS1 family
FRZ06_07795	ABC transporter permease	K23536	general nucleoside transport system permease protein
FRZ06_07800	ABC transporter permease	K23535	general nucleoside transport system permease protein
FRZ06_07805	ABC transporter ATP-binding protein	K23537	general nucleoside transport system ATP-binding protein
FRZ06_10425	xanthine permease	K16169	xanthine permease
FRZ06_11885	ABC transporter ATP-binding protein	K23537	general nucleoside transport system ATP-binding protein
FRZ06_13695	ATP-binding cassette domain-containing protein	K23537	general nucleoside transport system ATP-binding protein
FRZ06_17520	uracil permease	K06901	adenine/guanine/hypoxanthine permease
Nitrogen transport
FRZ06_00270	amino acid permease	K16238	ethanolamine permease
FRZ06_01145	ABC transporter ATP-binding protein	K02052	putative spermidine/putrescine transport system ATP-binding protein
FRZ06_01150	ABC transporter permease subunit	K02053	putative spermidine/putrescine transport system permease protein
FRZ06_01155	ABC transporter permease subunit	K02054	putative spermidine/putrescine transport system permease protein
FRZ06_01165	extracellular solute-binding protein	K02055	putative spermidine/putrescine transport system substrate-binding protein
FRZ06_03160	ammonium transporter	K03320	ammonium transporter, Amt family
FRZ06_05925	uracil permease	K02824	uracil permease
FRZ06_07335	ammonium transporter	K03320	ammonium transporter, Amt family
FRZ06_12310	ethanolamine permease	K16238	ethanolamine permease
FRZ06_13620	ABC transporter substrate-binding protein	K11069	spermidine/putrescine transport system substrate-binding protein
FRZ06_13625	ABC transporter permease	K11070	spermidine/putrescine transport system permease protein
FRZ06_13630	ABC transporter permease	K11071	spermidine/putrescine transport system permease protein
FRZ06_13635	ATP-binding cassette domain-containing protein	K11072	spermidine/putrescine transport system ATP-binding protein [EC:7.6.2.11]
FRZ06_16475	ammonium transporter	K03320	ammonium transporter, Amt family
FRZ06_15650	APC family permease	K14052	putrescine importer
Phosphate transport
FRZ06_09840	phosphate signaling complex protein PhoU	K02039	phosphate transport system protein
FRZ06_09845	phosphate ABC transporter ATP-binding protein	K02036	phosphate transport system ATP-binding protein [EC:7.3.2.1]
FRZ06_09850	phosphate ABC transporter permease PstA	K02038	phosphate transport system permease protein
FRZ06_09855	phosphate ABC transporter permease subunit PstC	K02037	phosphate transport system permease protein
FRZ06_09860	phosphate ABC transporter substrate-binding protein	K02040	phosphate transport system substrate-binding protein
FRZ06_12150	inorganic phosphate transporter	K03306	inorganic phosphate transporter, PiT family
Iron transport
FRZ06_14685	ABC transporter substrate-binding protein	K02012	iron(III) transport system substrate-binding protein
FRZ06_14695	ABC transporter ATP-binding protein	K02010	iron(III) transport system ATP-binding protein [EC:7.2.2.7]
FRZ06_14700	iron ABC transporter permease	K02011	iron(III) transport system permease protein
FRZ06_14750	ABC transporter substrate-binding protein	K02012	iron(III) transport system substrate-binding protein
FRZ06_14755	ABC transporter ATP-binding protein	K02010	iron(III) transport system ATP-binding protein [EC:7.2.2.7]
FRZ06_14760	iron ABC transporter permease	K02011	iron(III) transport system permease protein
FRZ06_14985	ferrous iron transport protein A	K04758	ferrous iron transport protein A
FRZ06_14990	ferrous iron transport protein B	K04759	ferrous iron transport protein B
FRZ06_15370	ABC transporter substrate-binding protein	K02016	iron complex transport system substrate-binding protein
FRZ06_15380	ABC transporter ATP-binding protein	K02013	iron complex transport system ATP-binding protein [EC:7.2.2.-]
FRZ06_15385	iron ABC transporter permease	K02015	iron complex transport system permease protein
FRZ06_17185	ferrous iron transport protein B	K04759	ferrous iron transport protein B
FRZ06_17190	ferrous iron transport protein A	K04758	ferrous iron transport protein A
FRZ06_17195	ferrous iron transport protein A	K04758	ferrous iron transport protein A
FRZ06_17435	ferrous iron transport protein B	K04759	ferrous iron transport protein B
FRZ06_17440	ferrous iron transport protein A	K04758	ferrous iron transport protein A
FRZ06_20790	ABC transporter ATP-binding protein	K02013	iron complex transport system ATP-binding protein [EC:7.2.2.-]
FRZ06_20795	iron ABC transporter permease	K02015	iron complex transport system permease protein
FRZ06_20800	ABC transporter substrate-binding protein	K02016	iron complex transport system substrate-binding protein
Organic sulfur transport
FRZ06_00940	ABC transporter permease	K15552	taurine transport system permease protein
FRZ06_00945	PhnD/SsuA/transferrin family substrate-binding protein	K15551	taurine transport system substrate-binding protein
FRZ06_00950	ABC transporter ATP-binding protein	K10831	taurine transport system ATP-binding protein [EC:7.6.2.7]
FRZ06_07440	ABC transporter ATP-binding protein	K15555	sulfonate transport system ATP-binding protein [EC:7.6.2.14]
FRZ06_07445	ABC transporter permease	K15554	sulfonate transport system permease protein
FRZ06_07450	ABC transporter substrate-binding protein	K15553	sulfonate transport system substrate-binding protein
FRZ06_17565	ABC transporter permease	K15554	sulfonate transport system permease protein
FRZ06_17570	ABC transporter ATP-binding protein	K15555	sulfonate transport system ATP-binding protein [EC:7.6.2.14]
FRZ06_17575	aliphatic sulfonate ABC transporter substrate-binding protein	K15553	sulfonate transport system substrate-binding protein
